# Supplementary material
Source: HighWire-hosted journal article supplement (https://jama.ama-assn.org/content/suppl/2010/01/05/302.17.1926)

# Influenza

La **influenza** (“gripe”) es una infección viral contagiosa que principalmente afecta la nariz, la garganta, las vías respiratorias y los pulmones. Es uno de los virus que más cambian; los cambios pueden ser pequeños y continuos, o abruptos. Los brotes de gripe ocurren anualmente, por lo general, desde noviembre hasta marzo, en el hemisferio norte. Se infectan, aproximadamente, entre el 5% y el 20% de los estadounidenses cada temporada de gripe. La mayoría de las personas mejora en el término de una semana, pero, en el caso de los ancianos, los bebés, los niños y las personas con algunas enfermedades crónicas, la influenza puede representar un riesgo para la vida. En los Estados Unidos, la influenza estacional anualmente produce la muerte de más de 36,000 personas y la hospitalización de otras 200,000. El número de *JAMA* del 4 de noviembre de 2009 incluye varios artículos acerca de la influenza.

## TIPOS DE INFLUENZA

Los virus de la influenza se clasifican como tipo A, B o C. El tipo A es el más común y causa la mayoría de las epidemias graves. Produce la infección de muchos animales, como patos, pollos y cerdos, así como de seres humanos. El tipo B puede causar epidemias, pero estas, por lo general, son más leves que las de la influenza tipo A. El tipo C nunca ha estado asociado con una epidemia. La influenza no es lo mismo que un resfriado común. De manera similar, la gastroenteritis no es influenza. El virus de la influenza H1N1, o “gripe porcina”, es un nuevo virus de la influenza tipo A, que probablemente haya sido el resultado de un cambio abrupto en la estructura del virus. Es tan diferente que nadie sabe cuán severo será en la población general; esto lleva a la preocupación acerca de que sea particularmente **virulento** (extremadamente severo). Actualmente, está causando una enfermedad global (pandémica).

## TRANSMISIÓN

La influenza se transmite de persona a persona por medio de gotículas, cuando las personas infectadas tosen o estornudan. También es posible infectarse después de tocar una superficie que ha sido contaminada por alguien que tiene gripe. Las personas que viven en condiciones de hacinamiento o que van a la escuela tienen el mayor riesgo de infección. Las personas pueden transmitir la infección desde el día anterior a que los síntomas se desarrollen y hasta cinco días después de enfermarse.

### EL RESFRIADO COMÚN EN COMPARACIÓN CON LA INFLUENZA

| SÍNTOMA                                  | RESFRIADO       | INFLUENZA                      |
|------------------------------------------|-----------------|--------------------------------|
| Infección respiratoria causada por virus | Sí              | Sí                             |
| Fiebre                                   | Poco frecuente  | Usual, dura de 2 a 3 días      |
| Dolor de cabeza                          | Poco frecuente  | Común                          |
| Dolores generales                        | Leves           | Usual, por lo general, severos |
| Fatiga, debilidad                        | En ocasiones    | Usual, hasta 2 a 3 semanas     |
| Agotamiento                              | Poco frecuente  | Usual                          |
| Congestión nasal                         | Común           | En ocasiones                   |
| Estornudos                               | Usuales         | En ocasiones                   |
| Dolor de garganta                        | Común           | En ocasiones                   |
| Tos                                      | Leve a moderado | Común                          |

## TRATAMIENTO Y PREVENCIÓN

La mejor defensa contra la influenza es la vacuna contra la gripe. Cada año, se crea una nueva vacuna, porque los virus de la influenza cambian anualmente. La vacuna contra la gripe para inyección se realiza a partir de virus muertos y, por lo tanto, no puede transmitir la gripe. Entre los efectos secundarios de la vacunación, se pueden incluir los siguientes: dolor en el sitio de la inyección, fiebre, fatiga y dolor muscular. Para obtener información acerca de las recomendaciones de vacunas, consulte el sitio web de Centers for Disease Control and Prevention (Centros para el Control y la Prevención de Enfermedades). Este otoño, se ofrecerá una vacuna separada contra el virus H1N1, además de la vacuna normal contra la gripe estacional. Se pueden usar medicamentos antivirales para tratar la influenza si estos se administran dentro de las 48 horas de los primeros síntomas. No se debe reemplazar la vacuna contra la gripe por los antivirales. No se deben usar antibióticos para tratar la influenza.

## PARA OBTENER MÁS INFORMACIÓN

- Centers for Disease Control and Prevention (Centros para el Control y la Prevención de Enfermedades) [www.cdc.gov/flu/flu\\_vaccine\\_updates.htm](http://www.cdc.gov/flu/flu_vaccine_updates.htm)
- National Institutes of Health (Institutos Nacionales de Salud) [www3.niaid.nih.gov/topics/Influenza/understandingInfluenza/](http://www3.niaid.nih.gov/topics/Influenza/understandingInfluenza/)
- World Health Organization (Organización Mundial de la Salud) [www.who.int/en/](http://www.who.int/en/)

## INFÓRMESE

Para encontrar esta y otras Hojas para el Paciente de *JAMA* anteriores, vaya al enlace Patient Page (Hoja para el Paciente) del sitio web de *JAMA* en [www.jama.com](http://www.jama.com). Muchas están disponibles en inglés y español.

Fuentes: Centers for Disease Control and Prevention, National Institutes of Health, World Health Organization

Huan J. Chang, MD, MPH, Redactor

Alison E. Burke, MA, Ilustradora

Richard M. Glass, MD, Editor

La Hoja para el Paciente de *JAMA* es un servicio al público de *JAMA*. La información y las recomendaciones que aparecen en esta hoja son adecuadas en la mayoría de los casos, pero no reemplazan el diagnóstico médico. Para obtener información específica relacionada con su afección médica personal, *JAMA* le sugiere que consulte a su médico. Los médicos y otros profesionales de atención médica pueden fotocopiar esta hoja con fines no comerciales, para compartirla con pacientes. Para comprar reimpressiones en grandes cantidades, llame al 312/464-0776.

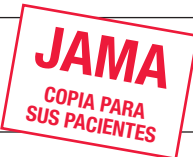

Supplement: pdfpat110409.pdf [file pdfpat110409.pdf]
